# Supplementary material for: Nanoscale 2CL-20·HMX high explosive cocrystal synthesized by bead milling
Source: Royal Society of Chemistry journal article supplement (doi:10.1039/c5ce00489f), 2015-01-01
Supplement: c5ce00489f1.pdf [file c5ce00489f1.pdf]

Supporting Information for

**Nanoscale 2CL-20·HMX High Explosive Cocrystal by Bead Milling**

Hongwei Qiu <sup>a</sup>, Rajen B. Patel <sup>b</sup>, Reddy S. Damavarapu <sup>b</sup>, Victor Stepanov <sup>b</sup>

<sup>a</sup> H. Qiu

Engineering and Technology Solutions Division,

Leidos, Inc.

Picatinny Arsenal, NJ 07806 (USA)

<sup>b</sup> R. B. Patel, R. Damavarapu, V. Stepanov

U.S. Army, Armament Research, Development, and Engineering Center

Picatinny Arsenal, NJ 07806 (USA)

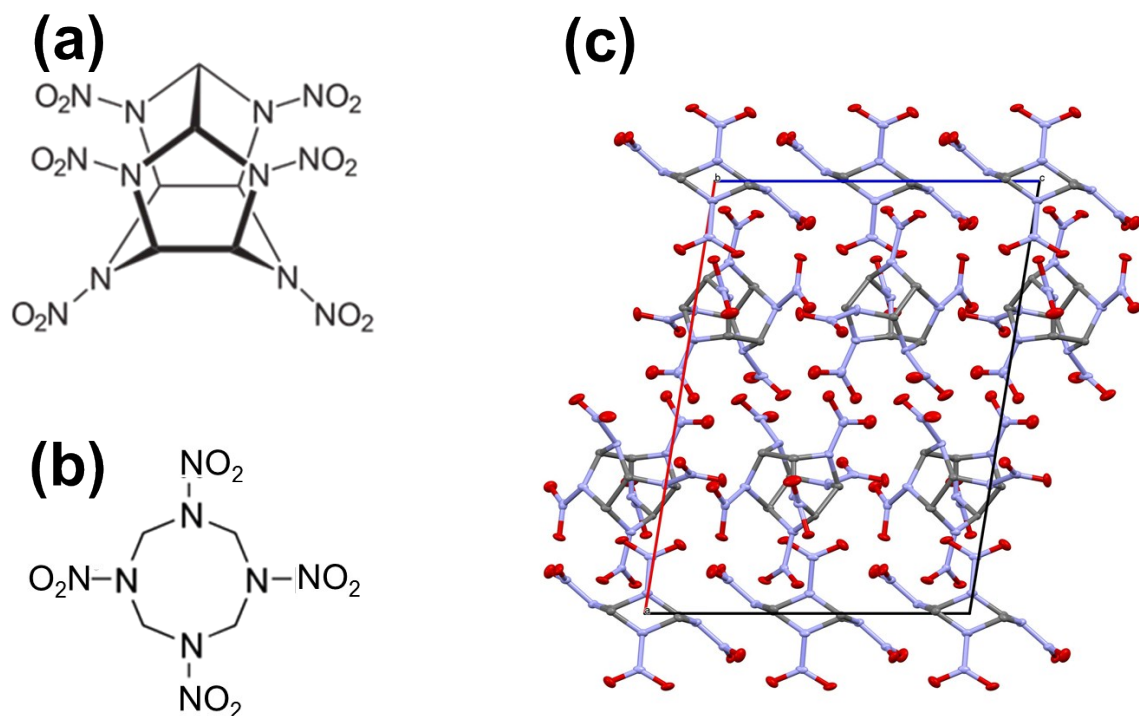

**Figure. S1.** Molecules of CL-20 (a) and HMX (b) and the unit cell of 2CL-20-HMX cocrystal viewed along (010) direction (c).

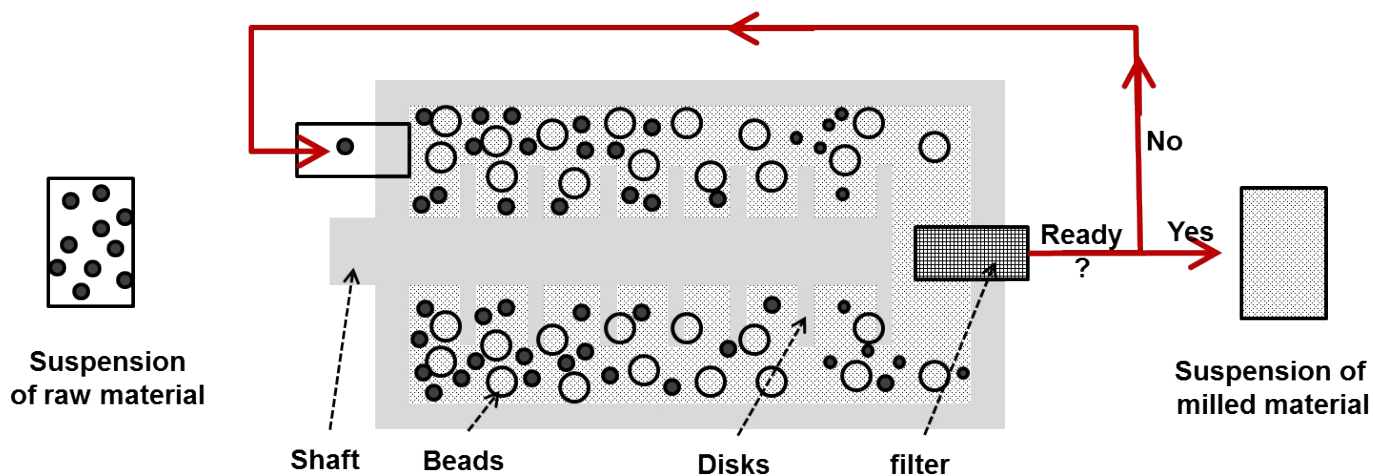

**Figure. S2.** A general schematic of the bead milling process. After a suspension is loaded into the mill, rotation of the shaft along with the disks at high speed causes intensive collisions between the grinding media and particles of interest and between the particles themselves, producing a suspension of milled material.
